# Supplementary material for: Metabolic Signatures of Extreme Longevity in Northern Italian Centenarians Reveal a Complex Remodeling of Lipids, Amino Acids, and Gut Microbiota Metabolism
Source: PLoS One. 2013 Mar 6;8(3):e56564. doi: 10.1371/journal.pone.0056564 (PMC3590212; doi:10.1371/journal.pone.0056564)
Supplement: Table S3 — All significantly regulated metabolites in blood serum (mean values ± SD) from the targeted MS on the three age groups. Significant differences were assessed by Mann-Whitney U test where “a” refers to changes between elderly and young, “b” refers to changes between centenarians and elderly, “c” between centenarians and young and marked as follows: *p<0.05., **p<0.01, ***p<0.001. Orange color refers to increased concentration, blue color refers to decreased concentration. (DOCX) [file pone.0056564.s005.docx]

**Table S3**

| Metabolites [μM/l] | Young | Elderly | Centenarians |
| --- | --- | --- | --- |
| Mean ± SD | Mean ± SD | Mean ± SD |
| Trp | 87.7 ± 15.2 | 80.5 ± 12.7 a(*) | 71.3 ± 11.5b(***),c(***) |
| PC32:0 | 9.58 ± 1.68 | 11.2 ± 2.39 a(**) | 12.7 ± 2.39 b(***),c(***) |
| PC34:4 | 0.86 ± 0.29 | 1.21 ± 0.45 a(***) | 0.85 ± 0.34 b(***) |
| PC36:5 | 9.39 ± 2.44 | 18.2 ± 15.4 a(***) | 11.7 ± 5.33 b(***) |
| PC36:6 | 0.38 ± 0.13 | 0.60 ± 0.31 a(**) | 0.40 ± 0.18 b(***) |
| PC38:4 | 78.4 ± 14.1 | 103 ± 28.3 a(***) | 85.3 ± 22.8 b(***) |
| PC38:6 | 46.4 ± 10.3 | 64.7 ± 22.9 a(***) | 52.8 ± 22.2 b(***) |
| PC40:6 | 15.0 ± 4.51 | 23.7 ± 8.95 a(***) | 18.9 ± 8.28 b(***) |
| PC-O 32:1 | 2.02 ± 0.36 | 2 ± 0.51 | 2.35 ± 0.63 b(***),c(***) |
| PC-O 34:1 | 7.34 ± 1.07 | 7.88 ± 1.71 | 9.54 ± 2.19 b(***),c(***) |
| PC-O 34:3 | 5.73 ± 1.4 | 5.07 ± 1.71 | 3.94 ± 1.54 b(***),c(***) |
| PC-O 36:2 | 9.54 ± 1.75 | 9.58 ± 2.39 | 9.29 ± 2.26 c (*) |
| PC-O 36:4 | 14.5 ± 2.83 | 14.4 ± 3.55 | 12.4 ± 2.56 b(***),c(***) |
| PC-O 38.0 | 1.27 ± 0.29 | 1.78 ± 0.64 a(***) | 1.31 ± 0.51b(***) |
| PC-O 38:6 | 4.64 ± 1.07 | 5.61 ± 1.51 a(***) | 4.61 ± 1.37b(***) |
| PC-O 40:1 | 1.23 ± 0.23 | 1.41 ± 0.41 | 1.02 ± 0.32b(***),c(***) |
| LPC 18:0 | 52.2 ± 12.9 | 52.1 ± 13.5 | 40.4 ± 12.0b(***),c(***) |
| LPC 18:2 | 61.1 ± 13.1 | 39.04 ± 12.4 a(***) | 27.6 ± 10.3b(***),c***) |
| LPC 20:4 | 11.5 ± 3.38 | 10.1 ± 3.23 a(*) | 8.07 ± 2.51b(***),c(***) |
| SM 16:0 | 119 ± 17.6 | 127.0 ± 22.6 a(*) | 138 ± 24.1b(**),c(***) |
| SM 24:0 | 23.4 ± 4.37 | 25.6 ± 5.31 | 19.8 ± 4.92b(***),c(**) |
| SM 24:1 | 55.9 ± 6.81 | 65.7 ± 10.9 a(***) | 69.8 ± 12.6b(*),c(***) |
| SM-OH 22:1 | 14.5 ± 2.94 | 16.1 ± 3.37 | 11.5 ± 3.04b(***),c(***) |
